# Supplementary material
Source: PubMed Central journal article supplement (PMC5915291)
Supplement: NIHMS77145-supplement-Metadata_S1.pdf [file NIHMS77145-supplement-Metadata_S1.pdf]

**Christian Winter, Nicole Köstner, Carl-Philip Kruspe, Damaris Urban, Simone Muck, Thomas Reinthaler, Gerhard J. Herndl. Mixing alters the lytic activity of viruses in the dark ocean. *Ecology***

## **Data S1**

**Fingerprinting data obtained from bacterial, archaeal, and viral communities.**

## **Authors**

Christian Winter

Department of Limnology and Bio-Oceanography, Center of Ecology, Univ. of Vienna  
Althanstrasse 14, 1090 Vienna, Austria  
phone: +43 1 4277 76433, email: christian.winter@univie.ac.at

Nicole Köstner

Department of Limnology and Bio-Oceanography, Center of Ecology, Univ. of Vienna  
Althanstrasse 14, 1090 Vienna, Austria

Carl-Philip Kruspe

Department of Limnology and Bio-Oceanography, Center of Ecology, Univ. of Vienna  
Althanstrasse 14, 1090 Vienna, Austria

Damaris Urban

Department of Limnology and Bio-Oceanography, Center of Ecology, Univ. of Vienna  
Althanstrasse 14, 1090 Vienna, Austria

Simone Muck

Department of Limnology and Bio-Oceanography, Center of Ecology, Univ. of Vienna  
Althanstrasse 14, 1090 Vienna, Austria

Thomas Reinthaler

Department of Limnology and Bio-Oceanography, Center of Ecology, Univ. of Vienna  
Althanstrasse 14, 1090 Vienna, Austria  
phone: +43 1 4277 76432, email: thomas.reinthaler@univie.ac.at

Gerhard J. Herndl

Department of Limnology and Bio-Oceanography, Center of Ecology, Univ. of Vienna

Althanstrasse 14, 1090 Vienna, Austria

phone: +43 1 4277 76431, email: gerhard.herndl@univie.ac.at

**File list (files found within DataS1.zip)**

explarchforward.csv

explarchreverse.csv

explbacforward.csv

explbacreverse.csv

explcra22.csv

explopal3.csv

exp2archforward.csv

exp2archreverse.csv

exp2bacforward.csv

exp2bacreverse.csv

exp2cra22.csv

exp2opal3.csv

exp3archforward.csv

exp3archreverse.csv

exp3bacforward.csv

exp3bacreverse.csv

exp3cra22.csv

exp3opal3.csv

exp4archforward.csv

exp4archreverse.csv

exp4bacforward.csv

exp4bacreverse.csv

exp4cra22.csv

exp4opal3.csv

exp5archforward.csv  
exp5archreverse.csv  
exp5bacforward.csv  
exp5bacreverse.csv  
exp5cra22.csv  
exp5opa13.csv

## Description

Valid for all data files: exp: number of experiment, time: time after start of incubations, 0: peak or band not present, 1: peak or band present, \N: placeholder for missing data in the SQL language.

Experiment 1 treatments: a1, b1: P-MSOW in MSOW; a2, b2: P-MSOW in NADW; a3, b3: P-NADW in MSOW; a4, b4: P-NADW in NADW; a5, b5: P-Mixture in MSOW; a6, b6: P-Mixture in NADW; a7, b7: P-Mixture in Mixture.

explarchforward.csv - archaeal fingerprinting data obtained with the forward primer from experiment 1.

explarchreverse.csv - archaeal fingerprinting data obtained with the reverse primer from experiment 1.

explbacforward.csv - bacterial fingerprinting data obtained with the forward primer from experiment 1.

explbacreverse.csv - bacterial fingerprinting data obtained with the reverse primer from experiment 1.

explcra22.csv - viral fingerprinting data obtained with the primer CRA22 from experiment 1.

explopa13.csv - viral fingerprinting data obtained with the primer OPA13 from experiment 1.

Experiment 2 treatments: a1, b1: P-AAIW in AAIW; a2, b2: P-AAIW in NADW; a3, b3: P-NADW in AAIW; a4, b4: P-NADW in NADW; a5, b5: P-Mixture in AAIW; a6, b6: P-Mixture in NADW; a7, b7: P-Mixture in Mixture.

exp2archforward.csv - archaeal fingerprinting data obtained with the forward primer from experiment 2.

exp2archreverse.csv - archaeal fingerprinting data obtained with the reverse primer from experiment 2.

exp2bacforward.csv - bacterial fingerprinting data obtained with the forward primer from experiment 2.

exp2bacreverse.csv - bacterial fingerprinting data obtained with the reverse primer from experiment 2.

exp2cra22.csv - viral fingerprinting data obtained with the primer CRA22 from experiment 2.

exp2opa13.csv - viral fingerprinting data obtained with the primer OPA13 from experiment 2.

Experiment 3 treatments: a1, b1: P-AAIW in AAIW; a2, b2: P-AAIW in NADW; a3, b3: P-NADW in AAIW; a4, b4: P-NADW in NADW; a5, b5: P-Mixture in AAIW; a6, b6: P-Mixture in NADW; a7, b7: P-Mixture in Mixture.

exp3archforward.csv - archaeal fingerprinting data obtained with the forward primer from experiment 3.

exp3archreverse.csv - archaeal fingerprinting data obtained with the reverse primer from experiment 3.

exp3bacforward.csv - bacterial fingerprinting data obtained with the forward primer from experiment 3.

exp3bacreverse.csv - bacterial fingerprinting data obtained with the reverse primer from experiment 3.

exp3cra22.csv - viral fingerprinting data obtained with the primer CRA22 from experiment 3.

exp3opa13.csv - viral fingerprinting data obtained with the primer OPA13 from experiment 3.

Experiment 4 treatments: a1, b1: P-NADW in NADW; a2, b2: P-NADW in AABW; a3, b3: P-AABW in NADW; a4, b4: P-AABW in AABW; a5, b5: P-Mixture in NADW; a6, b6: P-Mixture in AABW; a7, b7: P-Mixture in Mixture.

exp4archforward.csv - archaeal fingerprinting data obtained with the forward primer from experiment 4.

exp4archreverse.csv - archaeal fingerprinting data obtained with the reverse primer from experiment 4.

exp4bacforward.csv - bacterial fingerprinting data obtained with the forward primer from experiment 4.

exp4bacreverse.csv - bacterial fingerprinting data obtained with the reverse primer from experiment 4.

exp4cra22.csv - viral fingerprinting data obtained with the primer CRA22 from experiment 4.

exp4opa13.csv - viral fingerprinting data obtained with the primer OPA13 from experiment 4.

Experiment 5 treatments: a1, b1: P-NADW in NADW; a2, b2: P-NADW in AABW; a3, b3: P-AABW in NADW; a4, b4: P-AABW in AABW; a5, b5: P-Mixture in NADW; a6, b6: P-Mixture in AABW; a7, b7: P-Mixture in Mixture.

exp5archforward.csv - archaeal fingerprinting data obtained with the forward primer from experiment 5.

exp5archreverse.csv - archaeal fingerprinting data obtained with the reverse primer from experiment 5.

exp5bacforward.csv - bacterial fingerprinting data obtained with the forward primer from experiment 5.

exp5bacreverse.csv - bacterial fingerprinting data obtained with the reverse primer from experiment 5.

exp5cra22.csv - viral fingerprinting data obtained with the primer CRA22 from experiment 5.

exp5opa13.csv - viral fingerprinting data obtained with the primer OPA13 from
